# Supplementary material for: Symmetric Epistasis Estimation (SEE) and its application to dissecting interaction map of Plasmodium falciparum
Source: Royal Society of Chemistry journal article supplement (doi:10.1039/c2mb05333k), 2012-03-15
Supplement: c2mb05333k.pdf [file c2mb05333k.pdf]

# **Symmetric Epistasis Estimation (SEE) and its application to dissecting interaction map of *Plasmodium falciparum***

## **Supplementary Online Materials**

Yang Huang<sup>1</sup>, Geoffrey Siwo<sup>2</sup>, Stefan Wuchty<sup>1</sup>, Michael T. Ferdig<sup>2</sup>, Teresa  
M. Przytycka<sup>1\*</sup>

<sup>1</sup>National Center for Biotechnology Information, NLM, NIH, 8600 Rockville Pike, Building 38A,  
Bethesda, MD 20894.

<sup>2</sup>Eck Institute for Global Health, Department of Biological Sciences, University of Notre Dame, 100  
Galvin Life Sciences, Notre Dame, IN 46556.

\* corresponding author

## **Supplementary Results**

### **Comparison with a naïve method**

Applying a naïve method we would have to test all possible triplets for epistatic interactions, demanding huge computational resources and causing a serious multiple-testing issue. To verify that our selected candidate triplets were indeed enriched with epistatic interactions, we therefore randomly constructed 100,000 triplets from all possible triplets in Plasmodium dataset, demanding that loci were on different chromosomes. Fitting our models, we calculated and corrected *p*-values as described in the Methods. Repeating the process 10 times, we indeed observed higher fraction of significant, corrected *p*-values in the set of candidate triplets compared to random triplets, indicating enrichment of epistatic interactions in candidate triplets (Supplementary Fig. S1).

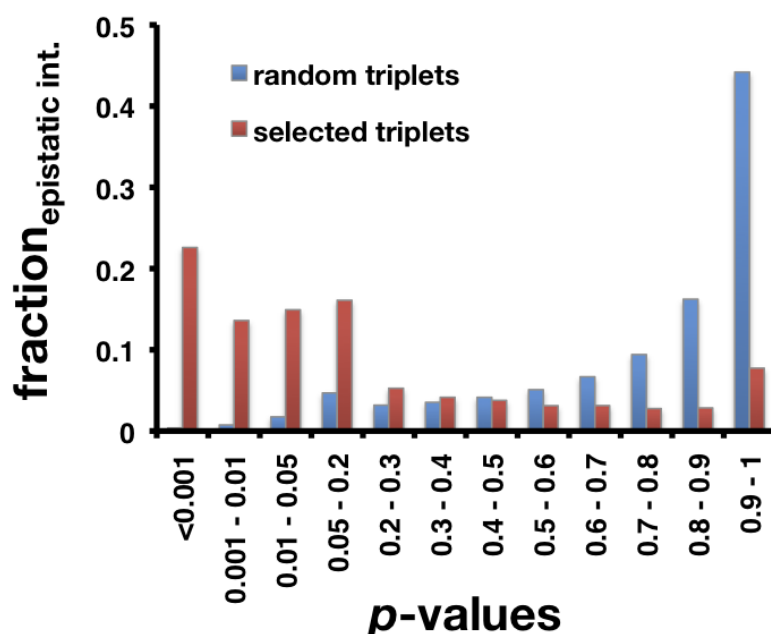

**Supplementary Figure S1** Determining the enrichment of candidate triplets that showed epistatic interactions, we observed a decreasing trend of the fraction of triplets that had epistatic interactions with increasing corrected  $p$ -value. In contrast, we randomized triplets and found an inverse trend, confirming that candidate triplets predominately carried epistatic interactions.

### Comparison with step-wise method

In order to compare the performance of our approach we also implemented a variation of Storey *et al.*'s step-wise search method<sup>1</sup>. For each gene expression trait, we selected a primary locus that provided the best association  $p$ -value. For each pair of an expression trait and its primary locus, we selected a secondary locus among all other loci, which allowed the best regression improvement using the epistatic interaction model (synergistic model) on the primary and secondary locus compared to the additive model. This way, we computed a secondary locus and a nominal  $p$ -value for each pair. We then generated a null distribution for the secondary locus as outlined in<sup>1</sup>. Finally, we compared their nominal  $p$ -values against the null distribution to estimate corrected  $p$ -values. In order to obtain the number of false positives, we calculated corresponding FDR<sup>2</sup>. By design, our method SEE is more likely to uncover an interaction for which both loci

contributed equally to the underlying synergistic effect. Since the step-wise methods detected eQTLs where one of the underlying two loci had a significant effect, we expected that results of both methods might overlap only to a small extent. Applying the step-wise method to our data, we obtained 7,665 candidate one-locus eQTLs and identified 74 locus pairs that had an interaction effect on a gene with  $p \leq 0.01$  and  $\text{FDR} \leq 0.24$ . In comparison to our set of 1,713 two-locus eQTLs, we indeed found a small overlap of four two-locus eQTLs. This relatively low overlap is hardly surprising since the step-wise approach calls for a primary locus with a maximal marginal effect among all possible loci, while our method looks for strong contributions from both loci — goals that are hard to achieve simultaneously given a relatively small progeny number.

### **Epistatic interaction in yeast defined by different statistical models**

We investigated the impact of the choice of different statistical models on the number of detected epistatic interactions in yeast. In particular, we implemented two variations of the step-wise method: (i) In analogy to the original step-wise approach, we first selected a primary locus that provided the best association  $p$ -value for each gene expression trait. For each pair of an expression trait and its primary locus, we selected a secondary locus, which allowed the best regression improvement using the synergistic model (eq. 1) compared to the one-locus model on the primary locus. We obtained 617 interactions in yeast when requiring  $\text{corr. } P \leq 0.05$ . (ii) In a second approach we started with the same initial selection of a primary locus. Then, for each pair of an expression trait and its primary locus, we selected a secondary locus, using a more stringent statistical model that compares the synergistic (eq. 1) to the additive model (eq. 2), only detecting 277 interactions with  $P \leq 0.05$  ( $\text{FDR} < 0.9$ ). Although both approaches utilized a step-wise filtering step, our statistical method returned fewer epistatic interactions, suggesting that the majority of epistatic interactions in yeast may be dominated by a significant one-locus main effect.

### **Comparing epistatic interactions with one-locus eQTLs**

Considering each epistatic interaction  $l', l'', g$  as two one-locus eQTLs,  $l', g$  and  $l'', g$ , we compared our set of 1,713 epistatic interactions to previously detected one-locus eQTLs.

Using one-locus eQTLs from GeD<sup>3</sup>, we found 110 one-locus eQTLs that appeared in epistatic interactions. Compared to the smaller set of one-locus eQTLs detected by Gonzales *et al.*<sup>4</sup> we found 17 epistatic interactions where the corresponding loci showed significant main effects on the gene expression trait. By definition, single loci in epistatic interaction locus pairs detected by us were not required to exert a main effect on the expression of the underlying gene, a condition that is more consistent with the ways actual molecular interactions can influence traits non-additively.

### **Tuning SEE parameters to detect more epistatic interaction**

Lowering the threshold of the minimal number of strains in an association clique, allows us to increase the number of nodes in the eQTL association graph as well as candidate triplets. As a consequence, however, the percentage of significant interactions over all candidate triplets decreases. In yeast, such a percentage dropped from 7% to 6% when we demanded 12 instead of 13 strains in each association clique while  $sp_D'' \geq 2$  and  $sp_{IC}'' \geq 35$ . Utilizing all association cliques with at least 6 strains we indeed found 8 epistatic interactions that were detected by Zhang *et al.*<sup>5</sup>. As a consequence, the percentage of significant interactions drastically drops while an enormous eQTL association graph required massive computational resources.

Supplementary Tables

See the Excel file for Supplementary Table S1, which contains 1,713 epistatic interactions in *P. falciparum* detected by SEE

**Supplementary Table S2** 14 epistatic interaction hotspots that were clustered into four hotspot regions based on their genomic proximity.

| hotspot region | locus1 | locus2 | target genes                                                                                                                                               |
|----------------|--------|--------|------------------------------------------------------------------------------------------------------------------------------------------------------------|
| 1              | 3_0    | 7_5.8  | MAL13P1.189, MAL13P1.247, MAL6P1.126, MAL7P1.151, PF07_0038, PF08_0066, PFA0200w, PFD0340c, PFD0415c, PFI0260c, PFI1415w, PFL1675c, PFL1765c               |
| 1              | 3_2.9  | 7_5.8  | MAL13P1.189, MAL13P1.247, MAL6P1.126, MAL7P1.151, PF07_0038, PF08_0066, PFA0200w, PFC0980c, PFD0415c, PFI0260c, PFI1415w, PFL1675c, PFL1765c               |
| 1              | 3_2.9  | 7_2.9  | MAL13P1.88, MAL7P1.147, MAL7P1.151, PF07_0038, PF14_0616, PFB0290c, PFD0415c, PFE0410w, PFF1325c, PFI0260c, PFI1415w                                       |
| 1              | 3_8.6  | 7_2.9  | MAL13P1.247, MAL13P1.88, MAL6P1.126, MAL7P1.147, MAL7P1.151, PF07_0038, PF11_0195, PF13_0282, PF14_0156, PF14_0258, PFB0290c, PFD0415c, PFE0410w, PFI0370c |
| 1              | 3_8.6  | 7_5.8  | MAL13P1.189, MAL13P1.247, MAL6P1.126, MAL7P1.151, PF07_0038, PF08_0066, PF14_0258, PF14_0710, PFB0290c, PFD0415c, PFI0260c, PFL1675c, PFL1765c             |
| 2              | 5_20   | 9_8.7  | MAL13P1.142, PF08_0005, PF10_0135, PF10_0316, PF11_0048, PF14_0233, PF14_0526, PF14_0664, PFC0805w, PFE0415w, PFL0510c                                     |
| 2              | 5_20   | 9_11.6 | MAL13P1.142, PF08_0005, PF10_0135, PF10_0316, PF11_0256, PF14_0233, PF14_0526, PF14_0664, PFE0415w, PFL0510c                                               |
| 2              | 5_25.8 | 9_8.7  | MAL13P1.142, MAL13P1.46, PF08_0121, PF11_0438, PF13_0117, PF13_0257, PF14_0233, PF14_0526, PFC0805w, PFE0415w, PFI0980w, PFL0510c                          |
| 2              | 5_25.8 | 9_11.6 | MAL13P1.142, MAL13P1.46, PF08_0121, PF11_0438, PF13_0117, PF13_0257, PF14_0233, PF14_0526, PFE0415w, PFL0510c                                              |

|   |         |        |                                                                                                                                             |
|---|---------|--------|---------------------------------------------------------------------------------------------------------------------------------------------|
| 2 | 5_31.5  | 9_11.6 | MAL13P1.46, PF08_0121, PF10_0135, PF11_0124, PF11_0438, PF13_0117, PF13_0257, PF14_0233, PF14_0526, PFE0415w, PFL0510c                      |
| 3 | 7_14.4  | 8_48.9 | PF10_0208, PF11_0002, PF11_0256, PF11_0486, PF14_0648, PFE1625c, PFL0305c, PFL1545c, PFL1740w, PFL2325c,                                    |
| 3 | 7_20.2  | 8_48.9 | PF10_0208, PF11_0124, PF11_0256, PF11_0360, PF11_0486, PF14_0648, PFE1625c, PFL0305c, PFL1740w, PFL2575c                                    |
| 3 | 7_23.1  | 8_48.9 | MAL13P1.273, PF10_0208, PF11_0124, PF11_0256, PF11_0486, PFB0820c, PFE1625c, PFL0305c, PFL1740w, PFL2575c                                   |
| 4 | 12_28.6 | 14_0   | MAL13P1.142, MAL13P1.45, MAL6P1.52, PF10_0407, PF11_0048, PF11_0329, PF11_0331, PF13_0254, PFB0290c, PFD1070w, PFE0410w, PFF0940c, PFI1415w |

**Supplementary Table S3** 110 epistatic interactions in yeast detected by SEE (corr. P ≤ 0.05).

| locus1         | locus2         | target gene | locus1        | locus2      | target gene |
|----------------|----------------|-------------|---------------|-------------|-------------|
| 7722_at_x06    | 9908_at_x05    | YPR184W     | 10539_at_x08  | 7351_at_x00 | YJL078C     |
| 4294_at_x14    | 4708_at_x08    | YPR184W     | 5626_at_x00   | 7006_at_x07 | YJL078C     |
| 6829_at_x01    | 7207_at_x04    | YGR041W     | 10403_at_x15  | 7313_at_x09 | YJL078C     |
| 6829_at_x01    | 7176_at_x09    | YGR041W     | 10396_at_x15  | 7313_at_x09 | YJL078C     |
| 2821_at_x00    | 9924_at_x09    | YPR184W     | 10539_at_x08  | 7313_at_x09 | YJL078C     |
| 8125_at_x07    | 9924_at_x09    | YPR184W     | 10396_at_x15  | 6979_at_x06 | YJL078C     |
| 6121_at_x01    | 8666_at_x04    | YOL130W     | 10539_at_x08  | 6979_at_x06 | YJL078C     |
| 6973_at_x00    | 8666_at_x04    | YOL130W     | 10396_at_x15  | 4990_at_x00 | YJL078C     |
| 7135_at_x15    | 8666_at_x04    | YOL130W     | 4023_s_at_x01 | 5241_at_x12 | YBR132C     |
| 7135_at_x15    | 8675_at_x06    | YOL130W     | 4023_s_at_x01 | 7132_at_x02 | YBR132C     |
| 7135_at_x15    | 8650_at_x11    | YOL130W     | 4023_s_at_x01 | 6969_at_x06 | YBR132C     |
| 4530_at_x00    | 9055_at_x14    | YFL026W     | 6900_at_x13   | 7222_at_x09 | YKL178C     |
| 10424_at_x12   | 4272_at_x07    | YKL178C     | 7722_at_x06   | 8499_at_x05 | YKL178C     |
| 4556_at_x05    | 4708_at_x08    | YKL178C     | 4472_s_at_x03 | 9567_at_x12 | YKL178C     |
| 4272_at_x07    | 4680_at_x10    | YKL178C     | 4472_s_at_x03 | 9592_at_x03 | YKL178C     |
| 4272_at_x07    | 5259_at_x15    | YKL178C     | 10238_at_x12  | 7346_at_x10 | YKL178C     |
| 10298_at_x05   | 4294_at_x14    | YKL178C     | 4431_at_x09   | 9962_at_x02 | YKL178C     |
| 10340_at_x07   | 4949_at_x12    | YKL178C     | 2128_s_at_x04 | 9962_at_x02 | YKL178C     |
| 10424_at_x12   | 4556_at_x05    | YKL178C     | 4651_at_x15   | 9779_at_x13 | YOL126C     |
| 10668_at_x04   | 4556_at_x05    | YKL178C     | 2826_at_x02   | 7524_at_x01 | YEL021W     |
| 10439_at_x07   | 4556_at_x05    | YKL178C     | 4550_at_x02   | 8004_at_x01 | YFL026W     |
| 7078_at_x01    | 8958_at_x14    | YKL178C     | 4545_at_x13   | 6969_at_x06 | YKL178C     |
| 10322_at_x15   | 10831_s_at_x15 | YKL178C     | 4556_at_x05   | 7114_at_x13 | YKL178C     |
| 10831_s_at_x15 | 9974_at_x15    | YKL178C     | 11254_at_x00  | 5282_at_x01 | YKL178C     |
| 3326_at_x07    | 9893_at_x10    | YGL009C     | 11215_at_x14  | 5282_at_x01 | YKL178C     |
| 3326_at_x07    | 9882_at_x08    | YGL009C     | 5241_at_x12   | 7794_at_x09 | YCL018W     |
| 2821_at_x00    | 9962_at_x02    | YPR184W     | 5241_at_x12   | 7808_at_x12 | YCL018W     |
| 3129_at_x00    | 7777_at_x07    | YNL327W     | 5241_at_x12   | 7808_at_x02 | YCL018W     |
| 4255_at_x03    | 6973_at_x00    | YOR390W     | 6929_at_x07   | 9055_at_x14 | YCL018W     |
| 10726_at_x09   | 6048_at_x15    | YER150W     | 4708_at_x08   | 9192_at_x06 | YDR033W     |
| 11289_at_x04   | 5384_at_x08    | YPL029W     | 4020_at_x12   | 8125_at_x07 | YEL021W     |
| 10746_at_x11   | 2334_s_at_x03  | YER150W     | 4949_at_x12   | 5984_at_x08 | YKL178C     |
| 5626_at_x00    | 9240_at_x07    | YNL327W     | 11254_at_x00  | 5435_at_x15 | YKL178C     |
| 5626_at_x00    | 9518_at_x11    | YNL327W     | 11215_at_x14  | 5435_at_x15 | YKL178C     |
| 7078_at_x01    | 7808_at_x12    | YNL327W     | 2186_at_x01   | 6973_at_x00 | YKL178C     |
| 7078_at_x01    | 7777_at_x07    | YNL327W     | 4550_at_x02   | 5054_at_x01 | YKL216W     |
| 10769_at_x04   | 7722_at_x06    | YPL029W     | 10331_at_x04  | 6310_at_x14 | YKL216W     |
| 4294_at_x14    | 5094_at_x08    | YKL178C     | 5384_at_x08   | 5569_at_x12 | YKL216W     |
| 6893_at_x00    | 7006_at_x07    | YKL178C     | 5411_at_x14   | 5569_at_x12 | YKL216W     |
| 7006_at_x07    | 9842_at_x07    | YKL178C     | 4495_at_x03   | 5544_at_x08 | YKL216W     |

|               |             |         |              |               |         |
|---------------|-------------|---------|--------------|---------------|---------|
| 4272_at_x07   | 5297_at_x09 | YKL178C | 4508_at_x14  | 5544_at_x08   | YKL216W |
| 4556_at_x05   | 5297_at_x09 | YKL178C | 10331_at_x04 | 2315_at_x06   | YKL216W |
| 10322_at_x15  | 2821_at_x00 | YKL178C | 5584_at_x06  | 9354_at_x14   | YKL216W |
| 4651_at_x15   | 6900_at_x13 | YKL209C | 4294_at_x14  | 5020_at_x08   | YKL216W |
| 4653_at_x00   | 6900_at_x13 | YKL209C | 4294_at_x14  | 4985_at_x15   | YKL216W |
| 4395_at_x11   | 6632_at_x05 | YKL209C | 4294_at_x14  | 4990_at_x00   | YKL216W |
| 10298_at_x05  | 6632_at_x05 | YKL209C | 10539_at_x08 | 4990_at_x00   | YKL216W |
| 4395_at_x11   | 6623_at_x08 | YKL209C | 10059_at_x00 | 10397_at_x00  | YKL216W |
| 4395_at_x11   | 6626_at_x11 | YKL209C | 4251_at_x08  | 9868_at_x08   | YKL216W |
| 5808_i_at_x00 | 9709_at_x03 | YFL026W | 10340_at_x07 | 4251_at_x08   | YKL216W |
| 10539_at_x08  | 7290_at_x01 | YJL078C | 10340_at_x07 | 4253_i_at_x00 | YKL216W |
| 10955_at_x05  | 7290_at_x01 | YJL078C | 10340_at_x07 | 4255_at_x03   | YKL216W |
| 10539_at_x08  | 7292_at_x05 | YJL078C | 4550_at_x02  | 5027_at_x06   | YKL216W |
| 10403_at_x15  | 7351_at_x00 | YJL078C | 4272_at_x07  | 5027_at_x06   | YKL216W |
| 10396_at_x15  | 7351_at_x00 | YJL078C | 6242_at_x13  | 7794_at_x09   | YLL013C |

References

1 Storey, J. D., Akey, J. M. & Kruglyak, L. Multiple locus linkage analysis of genome-wide expression in yeast. *PLoS Biol* **3**, e267 (2005).

2 Storey, J. D. & Tibshirani, R. Statistical significance for genome-wide studies. *Proc Natl Acad Sci U S A* **100**, 9440-9445 (2003).

3 Huang, Y., Wuchty, S., Ferdig, M. T. & Przytycka, T. M. Graph theoretical approach to study eQTL: a case study of Plasmodium falciparum. *Bioinformatics* **25**, i15-20 (2009).

4 Gonzales, J. M. *et al.* Regulatory hotspots in the malaria parasite genome dictate transcriptional variation. *PLoS Biol* **6**, e238 (2008).

5 Zhang W, Zhu J, Schadt EE, Liu JS. A Bayesian partition method for detecting pleiotropic and epistatic eQTL modules. *PLoS Comput Biol* **6**: e1000642 (2010).
